# Supplementary material
Source: Springer Nature journal article supplement (https://www.springerprofessional.de/resource/supplementary/13638_2013_802_MOESM4_ESM.pdf/11898458)

initial cluster radius = 0.1

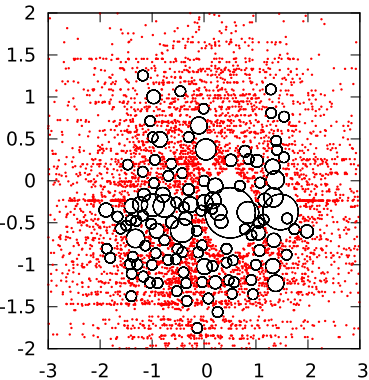

clusters ○  
anomalies ·

initial cluster radius = 0.3

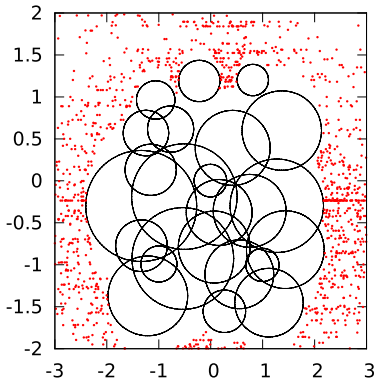

clusters ○  
anomalies ·

Supplement: MOESM4 [file 11898458]
